# Supplementary material
Source: PubMed Central journal article supplement (PMC9942243)
Supplement: NIHMS1870194-supplement-Supplementary_Materials.pdf [file NIHMS1870194-supplement-Supplementary_Materials.pdf]

**Supplementary Materials**

**Supplementary Table 1: Patient Characteristics by Ascertainment**

| <b>Variables</b>                                                     | <b>Overall<br/>(N=243)</b> | <b>MSK-IMPACT<br/>(N=133)</b> | <b>LS Registry<br/>(N=110)</b> | <b>p-value<sup>b</sup></b> |
|----------------------------------------------------------------------|----------------------------|-------------------------------|--------------------------------|----------------------------|
| <b>Sex</b>                                                           |                            |                               |                                |                            |
| Male                                                                 | 96 (40%)                   | 60 (45%)                      | 36 (33%)                       | 0.049                      |
| Female                                                               | 147 (60%)                  | 73 (55%)                      | 74 (67%)                       |                            |
| <b>Age at 1st cancer diagnosis<br/>(median, range)<sup>a</sup></b>   |                            |                               |                                |                            |
| Male                                                                 | 53.5 (15-84)               | 55.5 (15-84)                  | 44 (28-74)                     | 0.22                       |
| Female                                                               | 53 (1-88)                  | 53 (1-88)                     | 51 (30-74)                     | 0.59                       |
| <b>Self-Reported Race/Ethnicity</b>                                  |                            |                               |                                |                            |
| Non-Hispanic White                                                   | 209 (86%)                  | 107 (80%)                     | 102 (93%)                      | 0.14                       |
| Black                                                                | 14 (6%)                    | 10 (7%)                       | 4 (3%)                         |                            |
| Asian                                                                | 10 (4%)                    | 8 (6%)                        | 2 (2%)                         |                            |
| Other                                                                | 2 (1%)                     | 2 (2%)                        | 0 (0%)                         |                            |
| Hispanic                                                             | 5 (2%)                     | 2 (2%)                        | 1 (1%)                         |                            |
| Unknown                                                              | 3 (1%)                     | 4 (3%)                        | 1 (1%)                         |                            |
| <b>BMI at study enrollment, kg/m<sup>2</sup><br/>(median, range)</b> |                            |                               |                                |                            |
| Male                                                                 | 26.7<br>(17.6-39.8)        | 26.8<br>(17.6-39.8)           | 26.7<br>(21.5-36.8)            | 0.78                       |
| Female                                                               | 25.3<br>(15-52.8)          | 25.7<br>(15-52.8)             | 23.9<br>(17.9-42.9)            | 0.36                       |
| <b>Smoking Status</b>                                                |                            |                               |                                |                            |
| Ever smoker                                                          | 67 (28%)                   | 42 (32%)                      | 25 (23%)                       | 0.93                       |
| Never smoker                                                         | 142 (58%)                  | 89 (67%)                      | 53 (48%)                       |                            |
| Unknown/Missing                                                      | 34 (34%)                   | 2 (1%)                        | 32 (29%)                       |                            |

<sup>a</sup> In cancer-affected patients only.

<sup>b</sup> p-values are chi-squared/fisher's exact or ranksum.

**Legend:** Table depicts clinical characteristics for all patients overall and by ascertainment (MSK-IMPACT vs. LS Registry)

**Supplementary Table 2: Detailed Histology of Various Cancer Types**

A.

| <b>Endometrial Cancer Histology N=53</b> |                |                    |
|------------------------------------------|----------------|--------------------|
| <i>MSH6</i>                              | Overall (n=41) | MMR-D/MSI-H (N=25) |
| Endometrioid                             | 31             | 20                 |
| Clear Cell                               | 3              | 1                  |
| Mixed                                    | 2              | 2                  |
| Leiomyosarcoma                           | 1              | 1                  |
| De-differentiated                        | 0              | 0                  |
| Missing                                  | 4              | 1                  |
| <b><i>PMS2</i></b>                       |                |                    |
|                                          | Overall (n=12) | MMR-D/MSI-H (N=10) |
| Endometrioid                             | 7              | 7                  |
| Clear Cell                               | 1              | 0                  |
| Mixed                                    | 2              | 2                  |
| Leiomyosarcoma                           | 0              | 0                  |
| De-differentiated                        | 1              | 1                  |
| Missing                                  | 1              | 0                  |

B.

| <b>Ovarian Cancer Histology N=17</b> |                |                   |
|--------------------------------------|----------------|-------------------|
| <i>MSH6</i>                          | Overall (n=5)  | MMR-D/MSI-H (N=2) |
| Endometrioid                         | 1              | 0                 |
| Clear Cell                           | 1              | 1                 |
| Mixed endometrioid and serous        | 1              | 0                 |
| Carcinosarcoma                       | 1              | 1                 |
| Sertoliform/Wolffian                 | 1              | 0                 |
| <b><i>PMS2</i></b>                   |                |                   |
|                                      | Overall (n=12) | MMR-D/MSI-H (N=4) |
| Endometrioid                         | 3              | 2                 |
| Clear Cell                           | 4              | 0                 |
| High grade serous                    | 3              | 1                 |
| Poorly Differentiated                | 1              | 1                 |
| Sex Cord Stromal                     | 1              | 0                 |

C.

| Skin Tumor/Cancer Histology N=11 |                   |                   |
|----------------------------------|-------------------|-------------------|
| <i>MSH6</i>                      | Overall (n=6)     | MMR-D/MSI-H (N=3) |
| Sebaceous adenoma                | 4                 | 3                 |
| squamous cell carcinoma          | 1                 | 0                 |
| Missing                          | 1                 | 0                 |
| <i>PMS2</i>                      |                   |                   |
| Overall (n=5)                    | MMR-D/MSI-H (N=0) |                   |
| Basal Cell Carcinoma             | 3                 | 0                 |
| Squamous Cell Carcinoma          | 2                 | 0                 |

**Legend:** Tables depict detailed histological data on endometrial (A), ovarian (B), and skin (C) tumors/cancers observed in our cohort, overall and in MMR-D/MSI-H tumors.

**Supplementary Table 3: Age at Diagnosis of LS-associated Cancers with Screening/Risk-Reduction Recommendations**

| <b>Cancer Type</b>               | <b><i>MSH6</i></b> |                     |                        |                     | <b><i>PMS2</i></b> |                     |                        |                     |
|----------------------------------|--------------------|---------------------|------------------------|---------------------|--------------------|---------------------|------------------------|---------------------|
|                                  | All Tumors (N)     | Age (median, range) | MMR-D/MSI-H Tumors (N) | Age (median, range) | All Tumors (N)     | Age (median, range) | MMR-D/MSI-H Tumors (N) | Age (median, range) |
| <b>Colorectal</b>                | 47                 | 50<br>(27-78)       | 33                     | 50<br>(27-73)       | 31                 | 54<br>(29-80)       | 23                     | 54<br>(29-80)       |
| <b>Endometrial</b>               | 41                 | 55<br>(39-66)       | 25                     | 55<br>(39-66)       | 12                 | 56.5<br>(49-74)     | 10                     | 57<br>(49-74)       |
| <b>Ovary</b>                     | 5                  | 55<br>(40-56)       | 2                      | 55.5<br>(55-56)     | 12                 | 69<br>(37-73)       | 4                      | 52.5<br>(45-73)     |
| <b>Gastric/Esophageal</b>        | 5                  | 66<br>(44-72)       | 3                      | 69<br>(44-72)       | 1                  | 33<br>(33)          | 0                      |                     |
| <b>Pancreas/Biliary</b>          | 5                  | 69<br>(64-88)       | 3                      | 69<br>(67-72)       | 7                  | 70<br>(36-81)       | 1                      | 63<br>(63)          |
| <b>Urothelial</b>                | 5                  | 61<br>(42-84)       | 4                      | 69.5<br>(42-84)     | 2                  | 47<br>(28-66)       | 1                      | 66<br>(66)          |
| <b>Small Bowel</b>               | 1                  | 76<br>(76)          | 1                      | 76<br>(76)          | 5                  | 47<br>(36-51)       | 5                      | 47<br>(36-51)       |
| <b>Skin Tumors, Non-melanoma</b> | 6                  | 52<br>(35-65)       | 3                      | 58.5<br>(52-65)     | 5                  | 64<br>(61-67)       | 0                      |                     |

**Legend:** The table depicts number and age at diagnosis (median and range) for Lynch Syndrome-associated cancers with screening recommendations.

**Supplementary Table 4: Clinical Details of Patients with Colorectal Cancers Diagnosed Age <35**

| Study ID | Total Tumors                                                 | Sex    | Gene        | Pathogenic Variant                 | Age at 1st Cancer | MMR-D/ MSI-H CRC | IHC results <sup>b</sup> | Somatic Profile                                   | Meets criteria for CMMRD <sup>c</sup> ? (Y/N) |
|----------|--------------------------------------------------------------|--------|-------------|------------------------------------|-------------------|------------------|--------------------------|---------------------------------------------------|-----------------------------------------------|
| 53       | 5<br>- Urothelial<br>- Myxopapillary Ependymoma<br>- CRC x 3 | Male   | <i>PMS2</i> | c.1687C>T (p.Arg563*)              | 28                | Y                | PMS2 absent              | N/A                                               | N<br>(1 CALM)                                 |
| 88       | 1                                                            | Female | <i>MSH6</i> | c.3476dupA (p.Tyr1159*)            | 31                | Y                | MSH6 absent              | 49 variants (Not Ultrahypermutated <sup>a</sup> ) | N                                             |
| 92       | 1                                                            | Male   | <i>PMS2</i> | Deletion of exon 10                | 30                | Y                | PMS2 absent              | N/A                                               | N                                             |
| 94       | 1                                                            | Female | <i>PMS2</i> | c.765C>A (p.Tyr255*)               | 30                | Y                | PMS2 absent              | N/A                                               | N                                             |
| 120      | 1                                                            | Female | <i>MSH6</i> | c.3573dupT (p.Val1192Cysfs*2)      | 32                | Y                | MSH6 absent              | 70 variants (Not Ultrahypermutated <sup>a</sup> ) | N                                             |
| 162      | 1                                                            | Male   | <i>MSH6</i> | c.1569_1570delTT (p.Tyr524Glnfs*6) | 31                | Y                | MSH2 and MSH6 absent     | 420 variants (Ultrahypermutated <sup>a</sup> )    | N                                             |
| 243      | 1                                                            | Female | <i>MSH6</i> | Deletion exons 3-9                 | 27                | Y                | MSH2 and MSH6 absent     | 90 variants (Not Ultrahypermutated <sup>a</sup> ) | N                                             |

**Legend:** Table depicts clinical characteristics, tumor somatic profiling results, and criteria for constitutional mismatch repair deficiency (CMMRD).

<sup>a</sup> Ultrahypermutated defined as >150 somatic variants

<sup>b</sup> Immunohistochemistry results, absence only noted in tumor tissue whereas normal tissue demonstrated intact expression

<sup>c</sup> Proposed diagnostic criteria via C4CMMRD.<sup>1,2</sup>

Abbreviations: CRC – colorectal, Y – Yes, N- No, CALM - café-au-lait macules. N/A: Not available

For IHC results, if not specified then the protein was retained.

**Supplementary Table 5: Additional P/LP Germline Variants in LS Heterozygotes**

| <b>MSK-IMPACT (N=133) Other P/LP Variants</b>  |                                         |                                            |                |                                                                       |
|------------------------------------------------|-----------------------------------------|--------------------------------------------|----------------|-----------------------------------------------------------------------|
| <i>Gene</i>                                    | <i>Variant</i>                          | <i>ACMG/AMP Classification<sup>b</sup></i> | <i>LS Gene</i> | <i>Cancers</i>                                                        |
| <i>RTEL1</i>                                   | c.3791G>A<br>(p.Arg1264His)             | P/LP                                       | MSH6           | Lymphoma, Esophageal SCC (MMR-D/MSI-H)                                |
| <i>MUTYH</i>                                   | c.1187G>A<br>(p.Gly396Asp)              | P/LP                                       | PMS2           | Pancreatic cancer (MSS)                                               |
| <i>BRCA2</i>                                   | c.6468_6469delTC<br>(p.Gln2157Ilefs*18) | P/LP                                       | PMS2           | <b>Pancreatic cancer (MSS)</b>                                        |
| <i>APC</i>                                     | c.3920T>A<br>(p.Ile1307Lys)             | P/LP                                       | MSH6           | Urothelial cancer (MMR-D/MSI-H), Prostate cancer                      |
| <i>RECQL4</i>                                  | c.1048_1049delAG<br>(p.Arg350Glyfs*21)  | P/LP                                       | PMS2           | Endometrial Cancer (unknown MSI/MMR status), CRC (MSS/MMR proficient) |
| <i>APC<sup>a</sup></i>                         | c.3920T>A<br>(p.Ile1307Lys)             | P/LP                                       | MSH6           | CRC (MMR-D/MSI-H)                                                     |
| <i>FH<sup>a</sup></i>                          | c.1431_1433dupAAA<br>(p.Lys477dup)      | P/LP                                       | MSH6           | CRC (MMR-D/MSI-H)                                                     |
| <i>RECQL</i>                                   | c.1138A>T (p. Lys380*)                  | P/LP                                       | PMS2           | Ovarian Cancer (MSS/MMR proficient)                                   |
| <i>MUTYH</i>                                   | c.536A>G<br>(p.Tyr179Cys)               | P/LP                                       | MSH6           | CRC (MMR-D/MSI-H)                                                     |
| <i>RAD51D</i>                                  | c.574C>T (p.Gln192*)                    | P/LP                                       | PMS2           | <b>Ovarian Cancer (MSS/MMR proficient)</b>                            |
| <i>SDHA</i>                                    | c.667delG<br>(p.Asp223Ilefs*3)          | P/LP                                       | PMS2           | Ovarian Cancer (MSS/MMR proficient)                                   |
| <i>FH</i>                                      | c.1431_1433dupAAA<br>(p.Lys477dup)      | P/LP                                       | MSH6           | Gastric cancer (MMR-D/MSI-H)                                          |
| <i>CHEK2</i>                                   | c.1283C>T<br>(p.Ser428Phe)              | P/LP                                       | MSH6           | <b>CRC (MSS/MMR proficient)</b>                                       |
| <i>BAP1</i>                                    | c.783+2T>C ( )                          | P/LP                                       | PMS2           | CRC (MMR-D/MSI-H)                                                     |
| <i>APC</i>                                     | c.3920T>A<br>(p.Ile1307Lys)             | P/LP                                       | MSH6           | Endometrial cancer (MMR-D)                                            |
| <b>LS Registry (N=110) Other P/LP Variants</b> |                                         |                                            |                |                                                                       |
| <i>Gene</i>                                    | <i>Variant</i>                          | <i>ACMG/AMP Classification<sup>b</sup></i> | <i>LS Gene</i> | <i>Cancers</i>                                                        |
| <i>BRCA2</i>                                   | c.6468_6469delTC<br>(p.Gln2157Ilefs*18) | P/LP                                       | PMS2           | Unaffected                                                            |
| <i>APC</i>                                     | c.3920T>A<br>(p.Ile1307Lys)             | P/LP                                       | MSH6           | Unaffected                                                            |

<sup>a</sup> Represents same patient with 2 variants

<sup>b</sup> ACMG/AMP classification of variants<sup>3</sup>

## **References:**

1. Wimmer K, Kratz CP, Vasen HFA, et al. Diagnostic criteria for constitutional mismatch repair deficiency syndrome: suggestions of the European consortium 'Care for CMMRD' (C4CMMRD). *Journal of Medical Genetics*. 2014;51(6):355-365. doi:10.1136/jmedgenet-2014-102284
2. Aronson M, Colas C, Shuen A, et al. Diagnostic criteria for constitutional mismatch repair deficiency (CMMRD): recommendations from the international consensus working group. *Journal of Medical Genetics*. 2021;jmedgenet-2020-107627. doi:10.1136/jmedgenet-2020-107627
3. Richards S, Aziz N, Bale S, et al. Standards and guidelines for the interpretation of sequence variants: a joint consensus recommendation of the American College of Medical Genetics and Genomics and the Association for Molecular Pathology. *Genetics in medicine : official journal of the American College of Medical Genetics*. May 2015;17(5):405-24. doi:10.1038/gim.2015.30
